# Supplementary material
Source: PubMed Central journal article supplement (PMC4570866)
Supplement: NIHMS713391-supplement.pdf [file NIHMS713391-supplement.pdf]

## Supplementary Figure 1

**Fig. 1. A**

| Hsp72  | DnaJB1 | Hsp72<br>ΔEEVD |
|--------|--------|----------------|
| 68 % ● | WT ○   | 19 %           |
| 72 % ▲ | E50A △ | 65 %           |
| 79 % ▼ | K73A ▽ | 55 %           |
| 15 % ■ | — □    | 17 %           |

**Fig. 2. A**

| DnaJA2 |   |         |
|--------|---|---------|
| 79 % ● | + | ] Hsp72 |
| 21 % ■ | — |         |
| 28 % ○ | + | ] Hsp72 |
| 24 % □ | — |         |

**B**

| J-protein | Hsp70  |         |
|-----------|--------|---------|
| 93 % ●    | DnaJA2 | ] Ssa1  |
| 96 % ▲    | Ydj1   |         |
| 13 % ■    | —      | ] Ssa1  |
| 32 % ○    | DnaJA2 |         |
| 74 % △    | Ydj1   | ] Hsp70 |
| 14 % □    | —      | ] ΔEEVD |

**C**

|        |        |         |
|--------|--------|---------|
| 76 % ● | DnaJB1 | ] Hsp72 |
| 12 % ▲ | —      |         |
| 12 % ○ | DnaJB1 | ] Hsp72 |
|        |        | ] ΔEEVD |

  

|         |        |         |
|---------|--------|---------|
| 113 % ● | DnaJA2 | ] Hsp72 |
| 6 % ▲   | —      | ] Hsp72 |
| 96 % ○  | DnaJA2 | ] Hsp72 |
|         |        | ] ΔEEVD |

**Fig. 3.**

| Hsp72   | DnaJA2                  | Hsp72<br>ΔEEVD |
|---------|-------------------------|----------------|
| 78 % ●  | WT ○                    | 18 %           |
| 100 % ▲ | Zn <sub>Ydj1</sub> A2 △ | 77 %           |
| 73 % ▼  | Zn <sub>Xdj1</sub> A2 ▽ | 63 %           |
| 17 % ■  | — □                     | 17 %           |

**Fig. 4. B**

| Hsp72  | DnaJA2  | Hsp72<br>ΔEEVD |
|--------|---------|----------------|
| 80 % ● | WT ○    | 22 %           |
| 86 % ▲ | A145E △ | 67 %           |
| 31 % ▼ | S153K ▽ | 30 %           |
| 73 % ◆ | A161S ◇ | 29 %           |
| 88 % ● | A175G ○ | 51 %           |
| 86 % ★ | S187D ☆ | 72 %           |
| 89 % ■ | E198P □ | 33 %           |
| 24 % + | — ⊕     | 24 %           |

**E**

| Hsp72   | DnaJA2  | Hsp72<br>ΔEEVD |
|---------|---------|----------------|
| 82 % ●  | WT ○    | 20 %           |
| 98 % ▲  | K152A △ | 80 %           |
| 102 % ▼ | K199A ▽ | 79 %           |
| 105 % ◆ | K203A ◇ | 62 %           |
| 20 % ■  | — □     | 21 %           |

### Supplementary Figure 1.

The percent refolding at the final time point of the assays presented in Figures 1-4 of the main text are given. 150 minutes for all assays, except Figure 2B (60 min) and Fig 2C (80 min).
